# IS SHORT-TERM ACYCLOVIR TREATMENT RELATED WITH MORE UNFAVOURABLE OUTCOMES IN PATIENTS WITH HSV-1 ENCEPHALITIS?

Ferhat Arslan<sup>1</sup>, Ravza Akgündüz<sup>1</sup>, Abdülkadir Ermiş<sup>2</sup>, Begüm Bektaş<sup>1</sup>, Ebru Erbayat<sup>2</sup>, Haluk Vahaboğlu<sup>1</sup>

1. Department of Infectious Diseases, Istanbul Medeniyet University, Faculty of Medicine, Istanbul, Turkey

2. Department of Neurology, Istanbul Medipol University, Faculty of Medicine, Istanbul, Turkey

**Corresponding author:** Ferhat Arslan, Associate Professor

**Email addresses:** [ferhatarslandr@hotmail.com](mailto:ferhatarslandr@hotmail.com)

Department of Infectious Diseases, Istanbul Medeniyet University, Faculty of Medicine, Prof. Dr. Süleyman Yalcın Training and Research Hospital, Kadıköy, Istanbul

**Data availability :** If request it will be sent to the editors

**Conflicts of Interest and Source of Funding:** Authors have no competing interests to declare and not received any fund.

**Ethics approval statement:** Ethics committee approval was obtained from the ethics committee of Istanbul Medeniyet University.

**Patient consent statement:** In tertiary hospitals at Turkey , all admitted patients sign the consent form to publish their medical knowledge for scientific purposes.

24 **Ferhat Arslan:** Conceptualization, Methodology, Writing- Original draft preparation. **Ravza**  
 25 **Akgündüz:** Data curation, Investigation. **Abdülkadir Ermiş:** Data curation ,Investigation.  
 26 **Begüm Bektaş:** Data curation: **Ebru Erbayat:** Writing- Reviewing and Editing, **Haluk**  
 27 **Vahaboğlu:**Supervision

## 28 **ABSTRACT**

### 29 **Background**

30 Herpes simplex encephalitis (HSE) is the most common form of sporadic encephalitis which  
 31 is caused by herpes simplex virus type 1 (HSV-1). Current guidelines recommend intravenous  
 32 Acyclovir for 14–21 days in cases of HSE.

### 33 **Objectives**

34 Optimizing the Acyclovir treatment duration is important in regards to preventing Acyclovir-  
 35 related neurotoxicity and nephrotoxicity.

### 36 **Study design**

37 We retrospectively evaluated 13 patients, who were diagnosed with HSE by molecular testing  
 38 (HSV-1 PCR positivity in cerebrospinal fluid), in two university hospitals in Istanbul,  
 39 between 2010 and 2021. The patients were treated either 10 days or less as a short-term  
 40 treatment regimen of Acyclovir or for 14 days or more as long-term treatment regimen

41

### 42 **Results**

43 The median age was 58 years (range 24–82 years) and 54% of them were male. The median  
 44 follow-up time was 79 days (range 20-670 days) after discharge. Long-term treatment was  
 45 used in 6 and a short-term treatment regimen was used in 7 cases. One of the patients died on  
 46 the 4th day of Acyclovir treatment. One patient never received Acyclovir treatment. Of the 5  
 47 patients who received long-term treatment, 3 (21-28 days) had amnesia and orientation-

48 cooperation restriction, one (21 days) died on the 2nd day of treatment, while the other (14  
49 days) had no sequelae. There were no sequelae in three out of 5 patients who received short-  
50 term treatment.

## 51 Conclusions

52 We believe that it is necessary to determine the optimal Acyclovir therapy duration should be  
53 evaluated in a prospective randomized clinical trial in large patient population.

54 **Key words:** Herpes simplex virus ; Encephalitis; Acyclovir; Antiviral treatment; Antivirals

## 56 INTRODUCTION

58 Herpes simplex encephalitis (HSE) is the most common form of sporadic encephalitis which  
59 is caused by herpes simplex virus type 1 (HSV-1). HSV-1 generally infects orolabial mucosa  
60 and face skin epithelium, gains access to neuronal axonal ending, and then is transported to  
61 the trigeminal ganglia (TG)<sup>1</sup>. It is estimated approximately 200 million recurrent HSV-1  
62 related infections develop every year<sup>2</sup>. However, very few of these cases are HSE. The  
63 rareness might be due to its different ways of inoculation in the brain and TG or due to the  
64 primary infection rather than reactivation<sup>3</sup>. Despite the increasing knowledge, there are still  
65 unclear points in the pathogenesis of HSE.

66 Although it was reported that the mortality rates were above 70% and the rates of  
67 neurological sequelae were around 90%, it has now been decreased to 30% for both mortality  
68 and severe neurological sequelae<sup>4</sup>. Mortality rates have decreased significantly by the  
69 discovery of Acyclovir, improvements in radiological screening (cranial magnetic resonance  
70 imaging), and the use of molecular (HSV-1 DNA) diagnostic methods in medical practice.  
71 Vidarabine was used as a comparative drug in two double-blind, randomized controlled  
72 clinical trials investigating the efficacy and side effects of Acyclovir treatment for HSE<sup>5,6</sup>.

The duration of Acyclovir treatment was ten days in these trials. However, current guidelines recommend intravenous Acyclovir for 14–21 days in cases of HSE<sup>7,8</sup>. Optimizing the Acyclovir treatment duration is important in regards to preventing Acyclovir-related neurotoxicity and nephrotoxicity<sup>9</sup>. Here, we aimed to discuss the recommended treatment durations in patients with HSE by using short-term versus long-term acyclovir treatment. We also emphasize the effects of adjunctive therapies, such as steroids and antibiotics, on these cases.

## MATERIALS AND METHODS

### Patients

We retrospectively evaluated 13 patients, who were diagnosed with HSE by molecular testing (HSV-1 PCR positivity in cerebrospinal fluid), in two university hospitals in Istanbul, between 2010 and 2021. Their clinical (altered mental status, seizures or focal neurological symptoms) and radiological findings (detection of lesions in diffusion or contrast-enhanced MRI), were analyzed. The patients were treated either 10 days or less as a short-term treatment regimen of Acyclovir or for 14 days or more as long-term treatment regimen. Chronic Kidney Disease Epidemiology Collaboration (CKD-EPI) formula was used for the assessment of the renal damage for each case.

Ethics committee approval was obtained from the ethics committee of Istanbul Medeniyet University.

The neurological status for each case was noted from the outpatient follow-up records. Neurological sequelae have been defined as any damage to the central nervous system that results in cognitive, sensory, or motor deficits, which may also manifest as long-term emotional instability and seizures in severe cases<sup>10</sup>.

97

## 98 RESULTS

99

### 100 Clinical and MRI features

101

102 A summary of the clinical information of 13 patients is shown in **Table 1**.

103 The median age was 58 years (range 24–82 years) and 54% of them were male. The median  
 104 follow-up time was 79 days (range 20–670 days) after discharge. Five patients had an  
 105 underlying disease-causing immune deficiency: Two had organ tumors (Lung cancer and  
 106 prostate cancer, other two patients had Diabetes mellitus, which one of them with febrile  
 107 neutropenia due to hemophagocytic syndrome and one patient had recurrent orolabial Herpes  
 108 reactivation at the time of the diagnosis. The median duration of diagnosis, starting from the  
 109 symptom onset was 5 days (IQR 5 days Q3:8 Q1:3 IQR:5). The CSF analysis showed  
 110 lymphocytic pleocytosis in 9/13 patients (median leukocyte count 161 cells/mL, range 0–  
 111 500), and elevated protein concentration in 10/13 (median 91 mg/dL, range 35–349)  
 112 While unconsciousness was observed in all of the patients, no neck stiffness was found in any  
 113 of them. On admission, fever (9/13), headache (9/13), seizures (7/13) and focal neurological  
 114 signs (diplopia and hearing loss in 1 patient and right hemiparesis in another patient) were  
 115 noted.

116 In all patients, the clinical diagnosis of HSE was confirmed by the MRI findings of unilateral  
 117 (9 patients) or bilateral (3 patients) increased fluid-attenuated inversion recovery (FLAIR)/T2  
 118 signal abnormalities in temporal regions. In five patients, frontal (2 patients), hippocampal (2  
 119 patients) and occipital (1 patient) FLAIR/T2 signal abnormalities were additionally observed.

120

### 121 Treatment

Long-term treatment was used in 6 and a short-term treatment regimen was used in 7 cases. One of the patients died on the 4th day of Acyclovir treatment. One patient never received Acyclovir treatment. Twelve patients had also broad-spectrum antibiotic treatment at the beginning. Adjunctive steroid therapy was given in 3 patients. Antiepileptic therapy was needed for 10 patients. Treatment modalities and follow-up of renal functions are summarized in Table 2

## Outcomes

Death occurred in 2 patients. One of them was already on severe immunosuppressive therapy due to EBV-related hemophagocytosis. The other patient had lung cancer with brain metastases and subarachnoid hemorrhage. Of the 5 patients who received long-term treatment, 3 (21-28 days) had amnesia and orientation-cooperation restriction, one (21 days) died on the 2nd day of treatment, while the other (14 days) had no sequelae. There were no sequelae in three out of 5 patients who received short-term treatment, however, balance problems continued in one of them in 6 months after treatment. Neurological sequelae did not develop in the patient who did not receive any treatment. CKD-EPI decrease associated with renal failure was seen only in one patient.

## DISCUSSION

There is a solid consensus for the early initiation of effective antiviral agents in HSE, however, recommendations regarding the duration of the antiviral treatment is still at the level of expert opinion. Although this is a case series study and it is consisted of a small number of cases, we observed some interesting results: In short term Acyclovir treatment group, CNS symptoms of all 6 patients improve within the first week of the drug discontinuation, contrary

to the long-term treatment group, where the symptoms and signs of the HSE continued after the discontinuation. In another word, neurological sequelae in long-term treatment group were more common than the short-term treatment group. Additionally, the patients who received steroid treatments from both groups (patient 1,6,7,10) did not reveal any neurological deterioration. Seizure in one patient in 26th month and progressive amnesia in another patient on 5th month of the follow-up after short term treatment, respectively. Interestingly, neurological sequelae did not develop in the patient (patient 2 who was not given acyclovir treatment. One out of patients were treated with empirical antibiotics. Our observations may encourage steroid and short-term Acyclovir therapy in the management of the patients with HSE.

Stevens et al. showed that HSV viral replication continued for up to 8 days in a spinal ganglion of animal model study<sup>11</sup>. In a superior cervical ganglia (SCG) cell cultures-based HSV-1 model study, it was shown that phase 1 and phase 2 transcriptional processes take place in less than 5 days<sup>12</sup>. Toll like receptor 3 (TLR-3) dependent production of IFN- $\alpha/\beta$  and IFN- $\lambda$  is seen as a protective factor for HSE in children<sup>13</sup>. Additionally, Acyclovir doesn't have an inhibitor effect on the replication of the HSV-1 in human neural cell lines without human interferon-alpha (IFN-alpha)<sup>14</sup>. IFN- $\beta$  treatment in baby mice with HSV encephalitis model decreased neuro-invasion and increase the survival rate<sup>15</sup>. We may conclude that the combined effect of Acyclovir implementation and host interferon response can be achieved only at the early days of the HSE. In our study, the median time from symptoms onset to treatment initiation was 3.4 days in the group receiving short-term acyclovir treatment, while it is 6.6 days in the group receiving long-term treatment. This may contribute to the low rate of neurological sequelae in the group receiving short-term treatment.

Other probable justifications have been put forward for long-term antiviral treatment rationale. In situ low-level HSV-1 replication hypothesis examined in the prospective randomized double-blind study of Gnann et al, long-term Valacyclovir treatment was found to have no significant effect on neurological outcome<sup>16</sup>. The second issue is the assumed virological relapse that may be seen after the early cessation of acyclovir. In a long-term study of 32 adult HSE cases prospectively observed, HSE relapse was reported in 4 patients. However, HSV PCR positivity was not detected in any of the 12 CSF samples taken from these patients. It has been reported that putative relapses occur within the first 4 months after infection<sup>17</sup>. It was reported that HSV-1 antigen and HSV-1 DNA were detected immunohistochemically in the necrotic right frontal and parietal lobe samples from the autopsy of a patient who presented with status epilepticus 5 years after HSE<sup>18</sup>. The authors claim that this case is the first pathologically and molecularly confirmed relapse of HSE in the medical literature. However, progressive neurological deterioration throughout 5 years in the course of the case raises questions about whether the patient is in a relapse or a chronic autoimmune process<sup>19,20</sup>.

During the SARS-CoV-2 pandemic, there has been increased awareness about the possible antiviral effects of some drugs that are not used as virucidal<sup>21</sup>. Empirical antibiotics and steroids along with the Acyclovir treatment is a quite common clinical approach to the HSE cases in the first days before definitive diagnosis<sup>22</sup>. Inhibitory activity of Cephalosporin derivatives on HSV-1 was shown in vitro<sup>23</sup>. Similarly, some other molecules (Valproic acid, Valpromide and Valnoctamide) that inhibit the replication of HSV-1 virus in oligodendrocytes have been identified<sup>24</sup>. The researchers emphasized that these molecules could be an effective and safe treatment alternatives in HSE. The effect of non-antiviral drugs, especially antibiotics on HSE prognosis has not been studied.



195 Researchers have developed human induced pluripotent stem cells (hiPSCs) and neuronal  
196 cells based on 3D organoid models to establish HSV-1 infections<sup>25</sup>. Although in vitro  
197 establishment of neuron cells infection has been shown, there are in vivo differences. HSV-1  
198 has evolved latency mechanisms to stay in neuron cells in order to escape from immunity<sup>26</sup>.  
199 Due to the logic of co-evolution, the relationship between HSV and neuronal cells cannot be  
200 considered to be direct damage (cytopathic damage). The important question here is which  
201 cells are susceptible for HSV-1 replication in brain<sup>27</sup>. As we understand from the CSF finding,  
202 erythrocytosis, the blood-brain barrier (BBB) is disrupted in HSE patients<sup>28</sup>. Brain  
203 microvascular endothelial cells may play the primary role in neuronal damage due to HSV-1  
204 induced endothelial cell adhesion molecules that interact with lymphocytes and neutrophils  
205 recruitment<sup>29,30</sup>. We may speculate that steroids may play a role to diminish this recruitment  
206 and decrease the vascular inflammation as adjunctive therapy. Adjunctive steroid therapy  
207 initiation timing and its duration are still elusive<sup>31</sup>.

208 In conclusion, the optimal duration of antiviral treatment for HSE is still a controversial issue.  
209 Those who received short-term treatment might not have worse outcome than those who  
210 received long-term treatment in terms of neurological sequelae. We believe that it is necessary  
211 to determine the optimal Acyclovir therapy duration, as well as the steroids' effect on  
212 probable vasculitis and should be tested in a prospective randomized clinical trial in large  
213 patient population.

214

215

216

217

## 218 REFERENCES

- 219 1. Sawtell NM, Thompson RL. Alpha herpesvirus Latency and Reactivation with a Focus  
220 on Herpes Simplex Virus. *Curr Issues Mol Biol.* 2020;41:267-356.  
221 doi:10.21775/cimb.041.267
- 222 2. James C, Harfouche M, Welton NJ, et al. Herpes simplex virus: global infection  
223 prevalence and incidence estimates, 2016. *Bull World Health Organ.* 2020;98(5):315-  
224 329. doi:10.2471/BLT.19.237149
- 225 3. Steiner I. Herpes simplex virus encephalitis: new infection or reactivation? *Curr Opin*  
226 *Neurol.* 2011;24(3):268-274. doi:10.1097/WCO.0b013e328346be6f
- 227 4. McGrath N, Anderson NE, Crosson MC, Powell KF. Herpes simplex encephalitis  
228 treated with acyclovir: diagnosis and long term outcome. *J Neurol Neurosurg*  
229 *Psychiatry.* 1997;63(3):321-326. doi:10.1136/jnnp.63.3.321
- 230 5. Sköldenberg B, Forsgren M, Alestig K, et al. Acyclovir versus vidarabine in herpes  
231 simplex encephalitis. Randomised multicentre study in consecutive Swedish patients.  
232 *Lancet Lond Engl.* 1984;2(8405):707-711. doi:10.1016/s0140-6736(84)92623-0
- 233 6. Whitley RJ, Alford CA, Hirsch MS, et al. Vidarabine versus acyclovir therapy in herpes  
234 simplex encephalitis. *N Engl J Med.* 1986;314(3):144-149.  
235 doi:10.1056/NEJM198601163140303
- 236 7. Tunkel AR, Glaser CA, Bloch KC, et al. The Management of Encephalitis: Clinical  
237 Practice Guidelines by the Infectious Diseases Society of America. *Clin Infect Dis.*  
238 2008;47(3):303-327. doi:10.1086/589747
- 239 8. Solomon T, Michael BD, Smith PE, et al. Management of suspected viral encephalitis in  
240 adults – Association of British Neurologists and British Infection Association National  
241 Guidelines. *J Infect.* 2012;64(4):347-373. doi:10.1016/j.jinf.2011.11.014
- 242 9. Adair JC, Gold M, Bond RE. Acyclovir neurotoxicity: clinical experience and review of  
243 the literature. *South Med J.* 1994;87(12):1227-1231. doi:10.1097/00007611-199412000-  
244 00006
- 245 10. Ronca SE, Dineley KT, Paessler S. Neurological Sequelae Resulting from Encephalitic  
246 Alphavirus Infection. *Front Microbiol.* 2016;7:959. doi:10.3389/fmicb.2016.00959
- 247 11. Stevens JG, Cook ML. Latent herpes simplex virus in spinal ganglia of mice. *Science.*  
248 1971;173(3999):843-845. doi:10.1126/science.173.3999.843
- 249 12. Kim JY, Mandarino A, Chao MV, Mohr I, Wilson AC. Transient reversal of episome  
250 silencing precedes VP16-dependent transcription during reactivation of latent HSV-1 in  
251 neurons. *PLoS Pathog.* 2012;8(2):e1002540. doi:10.1371/journal.ppat.1002540
- 252 13. Lafaille FG, Pessach IM, Zhang S-Y, et al. Impaired intrinsic immunity to HSV-1 in  
253 human iPSC-derived TLR3-deficient CNS cells. *Nature.* 2012;491(7426):769-773.  
254 doi:10.1038/nature11583

14. Hanada N, Kido S, Kuzushima K, Goto Y, Rahman MM, Morishima T. Combined effects of acyclovir and human interferon-alpha on herpes simplex virus replication in cultured neural cells. *J Med Virol*. 1989;29(1):7-12. doi:10.1002/jmv.1890290103
15. Giraldo D, Wilcox DR, Longnecker R. The Innate Immune Response to Herpes Simplex Virus 1 Infection Is Dampened in the Newborn Brain and Can Be Modulated by Exogenous Interferon Beta To Improve Survival. *mBio*. 2020;11(3). doi:10.1128/mBio.00921-20
16. Gnann JW Jr, Sköldenberg B, Hart J, et al. Herpes Simplex Encephalitis: Lack of Clinical Benefit of Long-term Valacyclovir Therapy. *Clin Infect Dis*. 2015;61(5):683-691. doi:10.1093/cid/civ369
17. Sköldenberg B, Aurelius E, Hjalmarsson A, et al. Incidence and pathogenesis of clinical relapse after herpes simplex encephalitis in adults. *J Neurol*. 2006;253(2):163-170. doi:10.1007/s00415-005-0941-6
18. Yamada S, Kameyama T, Nagaya S, Hashizume Y, Yoshida M. Relapsing herpes simplex encephalitis: pathological confirmation of viral reactivation. *J Neurol Neurosurg Psychiatry*. 2003;74(2):262-264. doi:10.1136/jnnp.74.2.262
19. Schein F, Gagneux-Brunon A, Antoine J-C, et al. Anti-N-methyl-D-aspartate receptor encephalitis after Herpes simplex virus-associated encephalitis: an emerging disease with diagnosis and therapeutic challenges. *Infection*. 2017;45(4):545-549. doi:10.1007/s15010-016-0959-y
20. Armangue T, Leypoldt F, Málaga I, et al. Herpes simplex virus encephalitis is a trigger of brain autoimmunity. *Ann Neurol*. 2014;75(2):317-323. doi:https://doi.org/10.1002/ana.24083
21. Gordon DE, Jang GM, Bouhaddou M, et al. A SARS-CoV-2 protein interaction map reveals targets for drug repurposing. *Nature*. 2020;583(7816):459-468. doi:10.1038/s41586-020-2286-9
22. Hagen A, Eichinger A, Meyer-Buehn M, Schober T, Huebner J. Comparison of antibiotic and acyclovir usage before and after the implementation of an on-site FilmArray meningitis/encephalitis panel in an academic tertiary pediatric hospital: a retrospective observational study. *BMC Pediatr*. 2020;20(1):56. doi:10.1186/s12887-020-1944-2
23. Cottagnoud P, Neftel KA, Hany M, Zinkernagel RM. Inhibition of HSV-1 and vaccinia virus replication by cephalosporin derivatives. *Antiviral Res*. 1988;10(1):59-70. doi:10.1016/0166-3542(88)90014-9
24. Praena B, Bello-Morales R, de Castro F, López-Guerrero JA. Amidic derivatives of valproic acid, valpromide and valnoctamide, inhibit HSV-1 infection in oligodendrocytes. *Antiviral Res*. 2019;168:91-99. doi:10.1016/j.antiviral.2019.05.006
25. D'Aiuto L, Bloom DC, Naciri JN, et al. Modeling Herpes Simplex Virus 1 Infections in Human Central Nervous System Neuronal Cells Using Two- and Three-Dimensional Cultures Derived from Induced Pluripotent Stem Cells. *J Virol*. 2019;93(9). doi:10.1128/JVI.00111-19

26. Kalamvoki M, Du T, Roizman B. Cells infected with herpes simplex virus 1 export to uninfected cells exosomes containing STING, viral mRNAs, and microRNAs. *Proc Natl Acad Sci U S A*. 2014;111(46):E4991-4996. doi:10.1073/pnas.1419338111
27. Bello-Morales R, Fedetz M, Alcina A, Tabarés E, López-Guerrero JA. High susceptibility of a human oligodendroglial cell line to herpes simplex type 1 infection. *J Neurovirol*. 2005;11(2):190-198. doi:10.1080/13550280590924179
28. Liu H, Qiu K, He Q, Lei Q, Lu W. Mechanisms of Blood-Brain Barrier Disruption in Herpes Simplex Encephalitis. *J Neuroimmune Pharmacol Off J Soc NeuroImmune Pharmacol*. 2019;14(2):157-172. doi:10.1007/s11481-018-9821-6
29. Brankin B, Hart MN, Cosby SL, Fabry Z, Allen IV. Adhesion molecule expression and lymphocyte adhesion to cerebral endothelium: effects of measles virus and herpes simplex 1 virus. *J Neuroimmunol*. 1995;56(1):1-8. doi:10.1016/0165-5728(94)00110-a
30. Michael BD, Bricio-Moreno L, Sorensen EW, et al. Astrocyte- and Neuron-Derived CXCL1 Drives Neutrophil Transmigration and Blood-Brain Barrier Permeability in Viral Encephalitis. *Cell Rep*. 2020;32(11):108150. doi:10.1016/j.celrep.2020.108150
31. Piret J, Boivin G. Immunomodulatory Strategies in Herpes Simplex Virus Encephalitis. *Clin Microbiol Rev*. 2020;33(2). doi:10.1128/CMR.00105-19

**TABLE 1: CLINICAL FEATURES OF PATIENTS WITH HERPES SIMPLEX ENCEPHALITIS (HSE) WHO RECEIVED ACYCLOVIR TREATMENT**

|                  | Age range /Sex | Symptoms                                                   | Signs                                      | Cranial MRI findings                                                                             | CSF PCR                      | Time to Treatment <sup>a</sup> | Outcome           |
|------------------|----------------|------------------------------------------------------------|--------------------------------------------|--------------------------------------------------------------------------------------------------|------------------------------|--------------------------------|-------------------|
| <b>Patient 1</b> | (50-55)/F      | Altered mental status, dysarthria, behavioral changes      | Confused, disoriented, limited cooperation | Bilateral insular cortex, right temporal lobe, contrast enhancement and diffusion restriction    | CSF HSV Type-1 PCR: Positive | 1 day                          | No sequelae alive |
| <b>Patient 2</b> | (80-85)/M      | Fever, headache                                            | Lethargy                                   | Right temporal lobe, hippocampal, insular cortex contrast enhancement, and diffusion restriction | CSF HSV Type-1 PCR: Positive | None                           | No sequelae alive |
| <b>Patient 3</b> | (75-80)/F      | Altered mental status, dysarthria, difficulties on walking | Unconscious GCS=10                         | Bilateral temporal lobe (right dominant), contrast enhancement and diffusion restriction         | CSF HSV Type-1 PCR: Positive | 3 days                         | No sequelae alive |

|                   |           |                                                                                          |                                            |                                                                                                                                      |                              |         |                                           |
|-------------------|-----------|------------------------------------------------------------------------------------------|--------------------------------------------|--------------------------------------------------------------------------------------------------------------------------------------|------------------------------|---------|-------------------------------------------|
| <b>Patient 4</b>  | (40-45)/M | Altered mental status, dysarthria, fever, headache, nausea and vomiting, loss of balance | Confused, disoriented, limited cooperation | Right temporal lobe, parasilvian, hippocampal and parahippocampal contrast enhancement and diffusion restriction                     | CSF HSV Type-1 PCR: Positive | 7 days  | No sequelae alive                         |
| <b>Patient 5</b>  | (65-70)/F | Fever, Headache, Dysarthria                                                              | Confused, disoriented, limited cooperation | Left temporal lobe, hippocampal, insular cortex contrast enhancement and diffusion restriction                                       | CSF HSV Type-1 PCR: Positive | 5 days  | No sequelae alive                         |
| <b>Patient 6</b>  | (20-25)/F | Fever, headache, altered mental status, nausea and vomiting                              | Confused, disoriented, limited cooperation | Left temporal lobe, left insular cortex, uncut and hippocampus gyrus, dorsal thalamus contrast enhancement and diffusion restriction | CSF HSV Type-1 PCR: Positive | 3 days  | Loss of balance, seizures alive           |
| <b>Patient 7</b>  | (65-70)/M | Altered mental status, convulsion                                                        | Confused, disoriented, limited cooperation | Right temporal lobe, insular cortex T2 hyperintensity and diffusion restriction                                                      | CSF HSV Type-1 PCR: Positive | 5 days  | Dead                                      |
| <b>Patient 8</b>  | (20-25)/F | Fever, Headache, Seizure                                                                 | Lethargy                                   | Right temporal lobe, insular cortex, thalamus contrast enhancement and diffusion restriction                                         | CSF HSV Type-1 PCR: Positive | 3 days  | No sequelae alive                         |
| <b>Patient 9</b>  | (70-75)/M | Altered mental status, headache, vesicular rash                                          | Lethargy                                   | Normal                                                                                                                               | CSF HSV Type-1 PCR: Positive | 10 days | Dead                                      |
| <b>Patient 10</b> | (40-45)/M | Altered mental status, Fever, Decreased hearing,                                         | Confused, disoriented, Lethargy diplopia   | Right Frontotemporal lobe, T2 hyperintensity                                                                                         | CSF HSV Type-1 PCR: Positive | 7 days  | Dead                                      |
| <b>Patient 11</b> | (60-65)/F | Altered mental status, Convulsion, Fever, Headache                                       | Confused, disoriented, limited cooperation | Left temporal lobe, insular cortex, contrast enhancement and diffusion restriction                                                   | CSF HSV Type-1 PCR: Positive | 8 days  | Confused, loss of time orientation, alive |

|                   |           |                                                     |                                                            |                                                                                                         |                              |        |                                                            |
|-------------------|-----------|-----------------------------------------------------|------------------------------------------------------------|---------------------------------------------------------------------------------------------------------|------------------------------|--------|------------------------------------------------------------|
| <b>Patient 12</b> | (65-70)/M | Altered mental status, Fever, Convulsion            | Confused, disoriented, limited cooperation                 | Bilateral temporal lobe (right dominant), Right thalamus contrast enhancement and diffusion restriction | CSF HSV Type-1 PCR: Positive | 4 days | Confused, prolonged reaction time to complex orders, alive |
| <b>Patient 13</b> | (60-65)/M | Altered mental status, Headache, behavioral changes | Confused, disoriented, limited cooperation sensory aphasia | Right Fronto-temporal lobe, contrast enhancement and diffusion restriction                              | CSF HSV Type-1 PCR: Positive | 8 days | Confused, disoriented, alive                               |

<sup>a</sup>: Time from symptoms onset to treatment initiation

**TABLE 2: TREATMENT MODALITIES AND RENAL FUNCTIONS OF PATIENTS WITH HERPES SIMPLEX ENCEPHALITIS (HSE)**

| <b>Patients</b> | <b>Empirical antibiotics</b>                                   | <b>Acyclovir start time <sup>a</sup></b> | <b>Acyclovir duration</b> | <b>Steroid treatment</b> | <b>Antiepileptic treatment</b> | <b>CNS Symptoms resolved time</b> | <b>eGFR(CKD-EPI) on admission</b> | <b>eGFR(CKD-EPI) on discharge</b> |
|-----------------|----------------------------------------------------------------|------------------------------------------|---------------------------|--------------------------|--------------------------------|-----------------------------------|-----------------------------------|-----------------------------------|
| Patient 1       | Cefuroxime axetil,<br>Meropenem-<br>Linezolid-INH-<br>Rifampin | 1 d                                      | 10 d                      | 2 d                      | 1 months after discharge       | 3 days (AAS)                      | 97                                | 86                                |
| Patient 2       | Meropenem<br>Linezolid                                         | None                                     | None                      | None                     | None                           | 14th days of admission            | 45                                | 76                                |
| Patient 3       | Ampicillin                                                     | 3 d                                      | 9 d                       | None                     | 5 months after discharge       | 9 days (AAS)                      | 36                                | 55                                |
| Patient 4       | Ceftriaxone                                                    | 1 d                                      | 7 d                       | None                     | 2 months after discharge       | 4 days (AAS)                      | 117                               | 68                                |

|            |                                                  |     |      |            |                            |                                       |     |     |
|------------|--------------------------------------------------|-----|------|------------|----------------------------|---------------------------------------|-----|-----|
| Patient 5  | Amoxicilline-Clavulanate, Ampicillin-Ceftriaxone | 5 d | 7 d  | None       | None                       | 4 days (AAS)                          | 83  | 55  |
| Patient 6  | Ceftriaxone Ampicilline                          | 1 d | 10 d | 7 d + 20 d | 2nd day of hospitalization | 3 days (ASI)                          | 127 | 134 |
| Patient 7  | Piperacilline-Tazobactam                         | 5 d | 4 d  | None       | 2nd day of symptoms        | None                                  | 100 | 112 |
| Patient 8  | Ceftriaxone                                      | 1 d | 14 d | 3 d        | 2nd day of hospitalization | 10th days of admission                | 131 | 123 |
| Patient 9  | Ceftriaxone                                      | 1 d | 21 d | None       | None                       | 12th days of admission                | 85  | 82  |
| Patient 10 | meropenem                                        | 7 d | 21 d | 10 d       | None                       | 14 days (AAS)                         | 70  | 36  |
| Patient 11 | Ceftriaxone                                      | 8 d | 28 d | None       | 1st day of hospitalization | 5 days (AAS), but confusion permanent | 74  | 95  |



|            |                              |     |      |      |                            |                                      |    |     |
|------------|------------------------------|-----|------|------|----------------------------|--------------------------------------|----|-----|
| Patient 12 | Ceftriaxone and levofloxacin | 4 d | 24 d | None | 1st day of hospitalization | 7 days (AAS) but confusion permanent | 81 | 102 |
| Patient 13 | None                         | 8 d | 21 d | None | 3rd day of hospitalization | 3 days (AAS)                         | 72 | 62  |

<sup>a</sup>: Time from symptoms onset to treatment initiation

CNS: Central nervous system; AAS: After acyclovir stopped; ASI: After steroid initiation
